# Supplementary material
Source: Springer Nature journal article supplement (https://www.springermedizin.de/resource/supplementary/12885_2006_459_MOESM3_ESM.pdf/9469496)

**CONTROL****RADIATION****GENISTEIN****GEN + RAD****15  $\mu$ mol/L Genistein  
(Day 3)**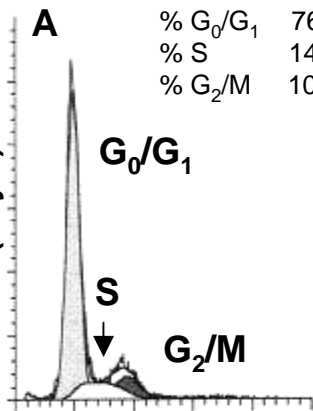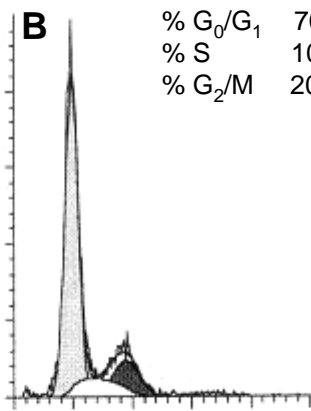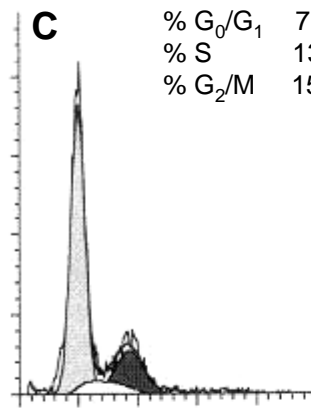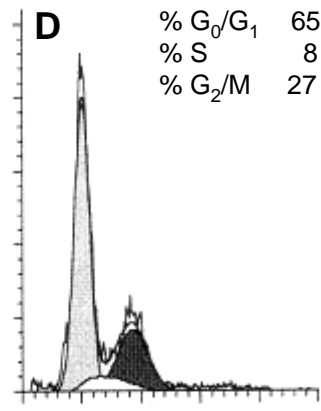**15  $\mu$ mol/L Genistein  
(Day 4)**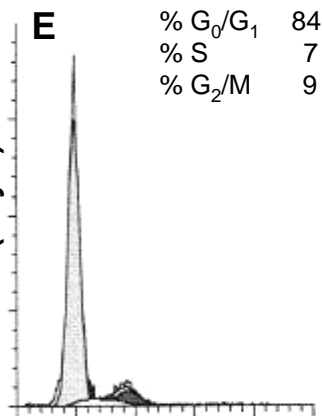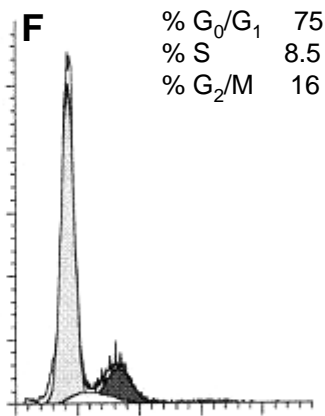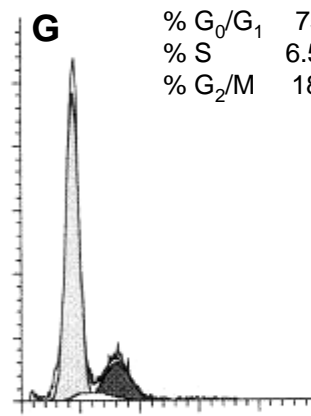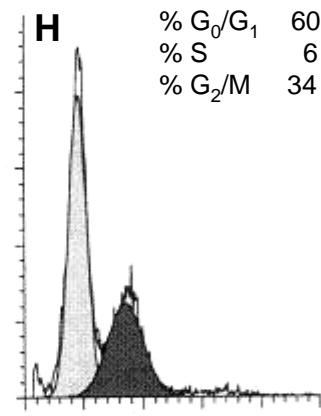**30  $\mu$ mol/L Genistein  
(Day 4)**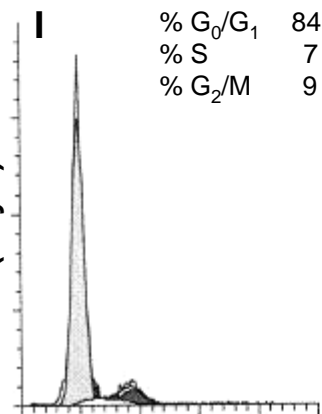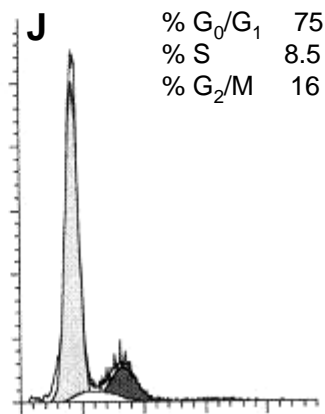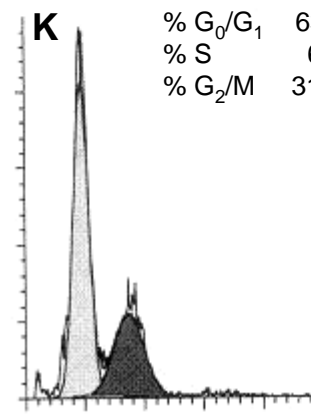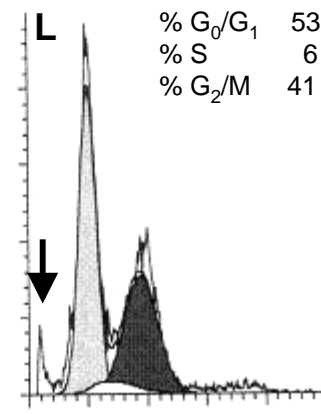

Supplement: MOESM3 [file 9469496]
